# Supplementary material
Source: PubMed Central journal article supplement (PMC4966327)
Supplement: JCI85328.sd.pdf [file JCI85328.sd.pdf]

**A**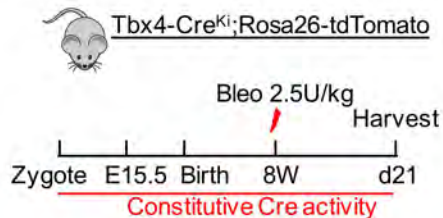**B**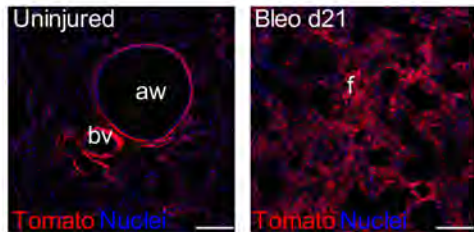

**Supplementary Figure 1** Tbx4 lineage cells are immensely expanded during fibrosis . (A) Schematic depicting lineage analysis methodology. Tbx4-Cre<sup>Ki</sup>;Rosa26-Tm mice were used for experiments in this figure. (B) Representative histological sections of Tbx4-Cre<sup>Ki</sup>;Rosa26-Tm mouse lungs at uninjured 8 weeks-old, and bleomycin treated (d21) adult Tbx4-Cre;Rosa26-Tm with Tbx4 lineage cells in red, and nuclei in blue.  $n = 9$  lungs examined. Scale bars, 100  $\mu\text{m}$ . aw = airway, bv = blood vessel, f = fibrotic foci.

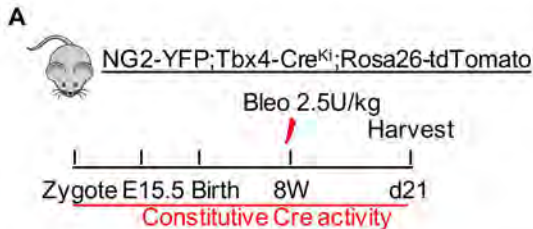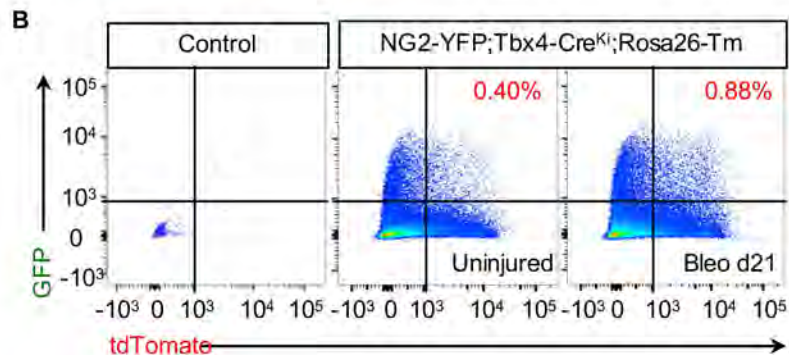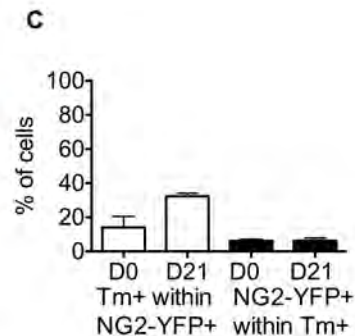

**Supplementary Figure 2** Tbx4 lineage cells in the lung include a portion of the NG2+ pericytes. **(A)** Representative FACS plot of mouse lung single cells isolated from bleomycin treated (d21) NG2-YFP;Tbx4-Cre<sup>Tg</sup>;Rosa26-Tm mice. **(C)** Bar graph showing percentages of the NG2-YFP+ and tdTomato double positive cells within tdTomato labeled Tbx4 lineage cells and within NG2-YFP+ cells.  $n = 3$  mice analyzed, mean  $\pm$  SEM.

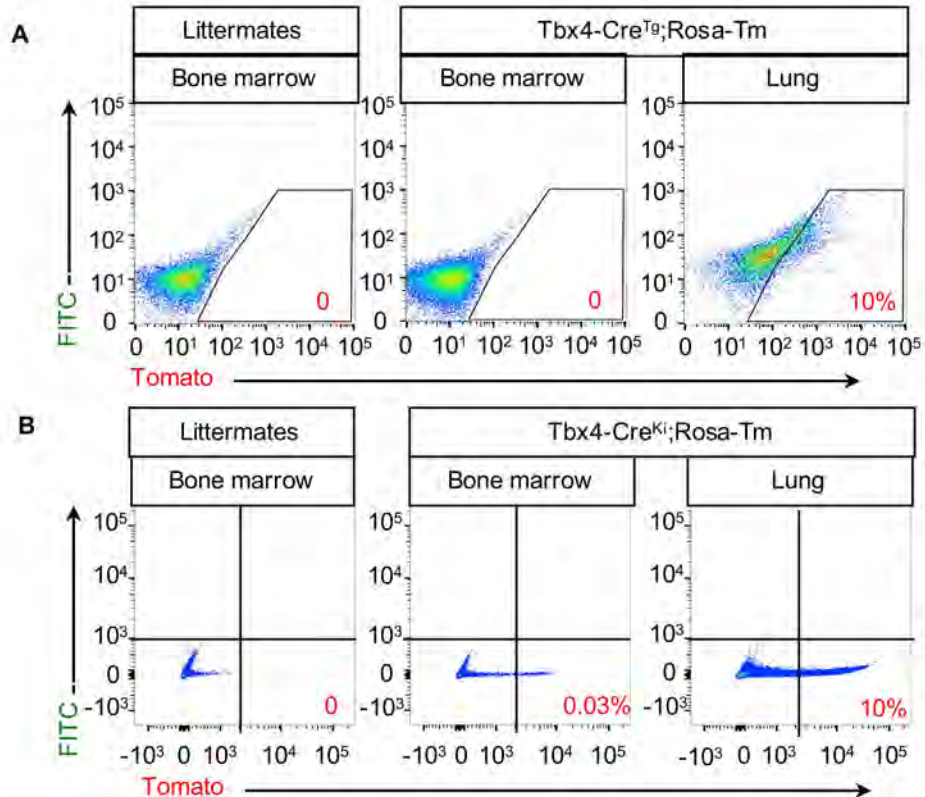

**Supplementary Figure 3** Tbx4 lineage in bone marrow and the lung. **(A-B)** FACS analysis of bone marrow and lung single cells from Tbx4-Cre<sup>Tg</sup>;Rosa26-Tm **(A)** or Tbx4-Cre<sup>Ki</sup>;Rosa26-Tm mice **(B)**. There were around 10% of Tbx4<sup>+</sup> cells within the lung single cells from Tbx4-Cre<sup>Tg</sup>;Rosa26-Tm or Tbx4-Cre<sup>Ki</sup>;Rosa26-Tm mice. Bone marrow from Tbx4-Cre<sup>Tg</sup>;Rosa26-Tm and littermate control mice showed no labeling of tdTomato, while bone marrow from Tbx4cre<sup>Ki</sup>;Rosa26-Tm mice included very small amount (around 0.03%) of tdTomato labeled cells compared with littermate control mice.  $n = 3$  mice analyzed.

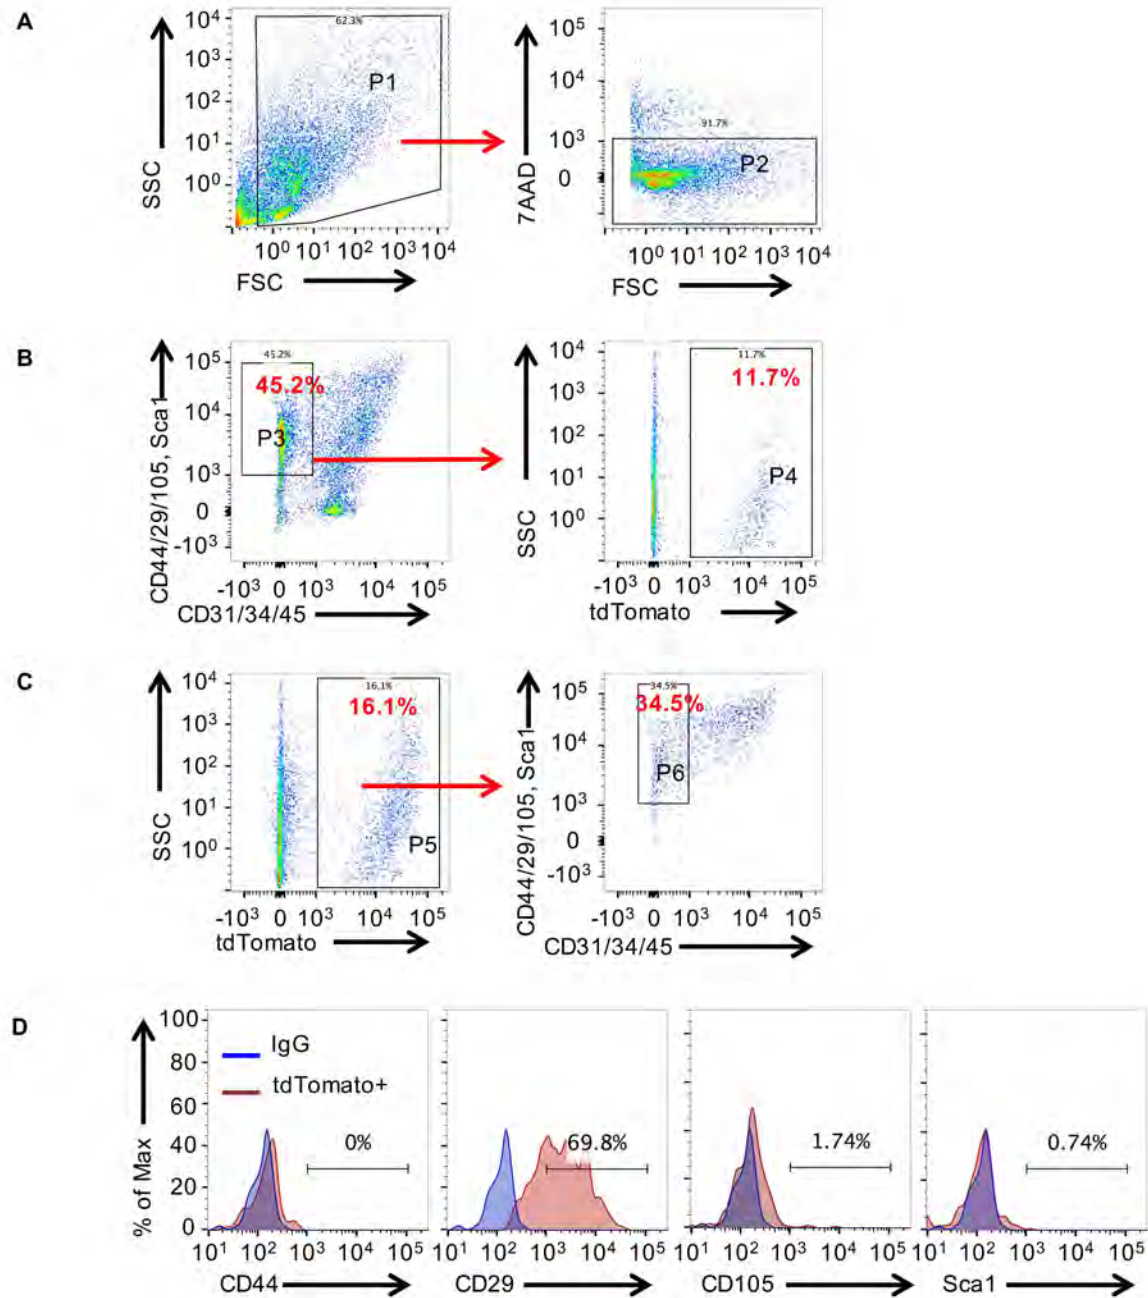

**Supplementary Figure 4** Non classic MSC pattern for Tbx4-lineage cells. (A) FACS analysis for single cell suspension of Tbx4-Cre<sup>Tg</sup>;Rosa26-tdTomato mouse lung. (B) Within 7AAD negative total single lung cells (P2), around 45% cells are CD44,CD29,CD105,and Sca1 positive and CD31,CD34,and CD45 negative. Within CD44/29/105,Sca1+ & CD31/34/45-cells (P3), around 11% cells (P4) are tdTomato positive. (C) Within 7AAD- total single lung cells, around 16% cells are tdTomato positive. Within tdTomato positive cells (P5), around 34% cells are CD44/29/105,Sca1+ & CD31/34/45- (P6). (D) The above-mentioned surface antigens were further analyzed individually. Within Lin-Tbx4+ cells, around 69% of tdT+ cells are stained with CD29, and other markers (CD44, CD105 and Sca1) are minimal or not detectable. *n* = 3 mice analyzed.

### Primary mouse lung fibroblasts

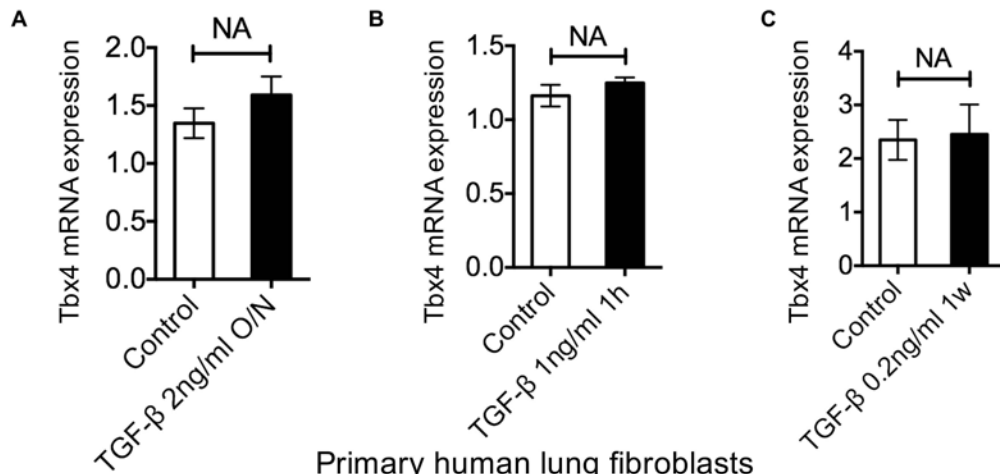

### Primary human lung fibroblasts

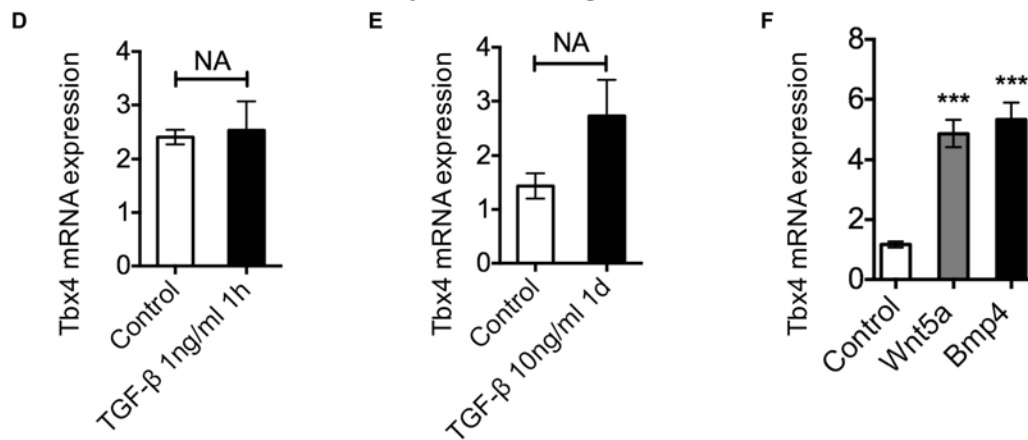

**Supplementary Figure 5** Tbx4 upstream regulation in fibroblasts in culture. **(A-C)** Lung fibroblasts were isolated from uninjured WT mouse lung and cultured for 3 passages. Tbx4 mRNA expression was analyzed by qRT-PCR upon different doses and time of TGF- $\beta$  treatment. **(D-E)** Tbx4 expression did not respond to TGF- $\beta$  treatment in primary human lung fibroblasts. **(F)** Treatment with Wnt5a (250ng/ml) and Bmp4 (100ng/ml) in human lung fibroblasts for 4 hrs significantly upregulated Tbx4 expression.  $n \geq 3$  in each group. All results are the mean of triplicate experiments  $\pm$  SEM, NA no significant difference, \*\*\* $P \leq 0.001$  analyzed by Student's *t*-test **(A-E)** or one-way ANOVA with Bonferroni test **(F)**.

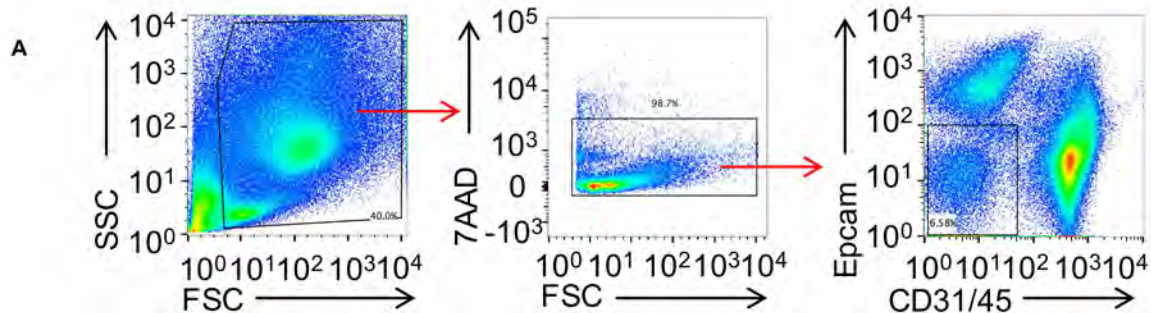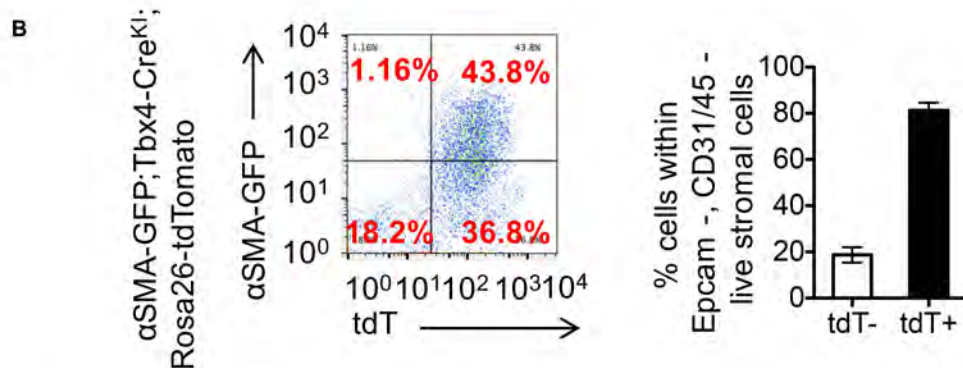

**Supplementary Figure 6** FACS analysis of Tbx4-lineage cells in the lungs of  $\alpha$ SMA-GFP;Tbx4-Cre<sup>KI</sup>;Rosa26-tdTomato mouse strains. **(A)** FACS analysis of lung single cells gate for 7AAD<sup>-</sup>, Epcam<sup>-</sup>, and CD31/45<sup>-</sup>. **(B)** FACS plot and percentage of 7AAD<sup>-</sup>, Epcam<sup>-</sup>, and CD31/45<sup>-</sup> stromal cells expressing tdTomato or GFP in uninjured  $\alpha$ SMA-GFP;Tbx4-Cre<sup>KI</sup>;Rosa26-tdTomato mouse lung.  $n = 3$  mice analyzed, mean  $\pm$  SEM.

Bleo d21  $\alpha$ SMA-GFP mouse lung

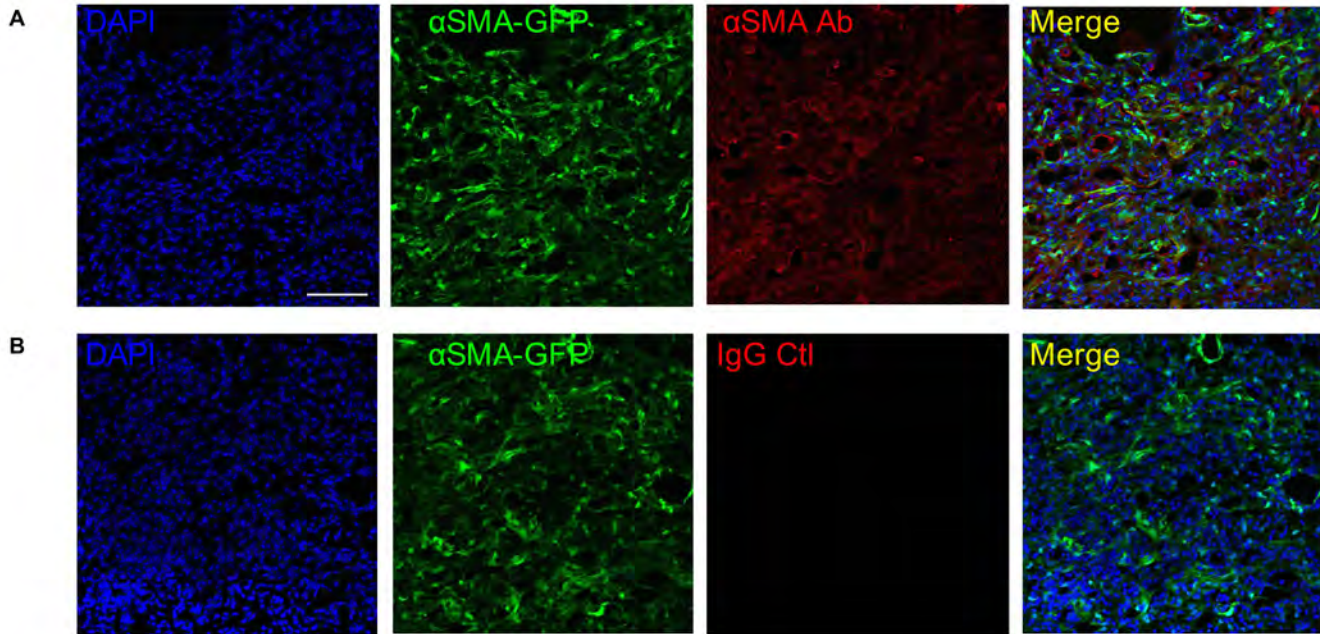

**Supplementary Figure 7**  $\alpha$ SMA-GFP expression pattern is comparable with antibody staining. **(A)**  $\alpha$ SMA antibody staining for bleo d21  $\alpha$ SMA-GFP mouse lung. **(B)** IgG control.  $n = 3$  lungs examined, Scale bars, 100  $\mu$ m.

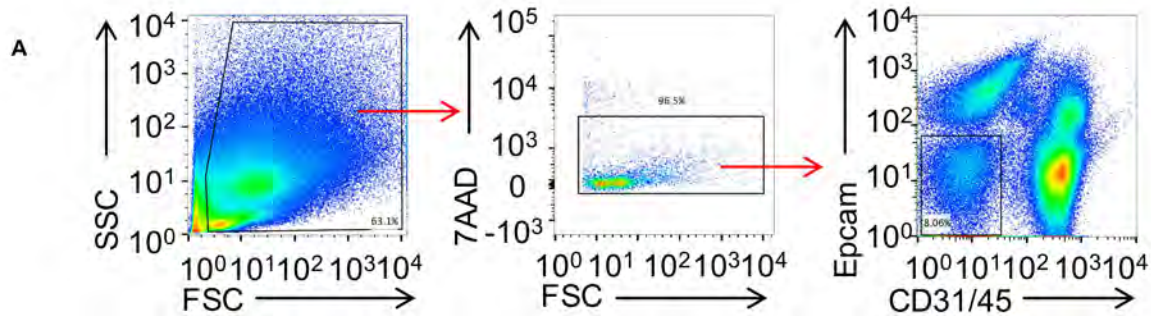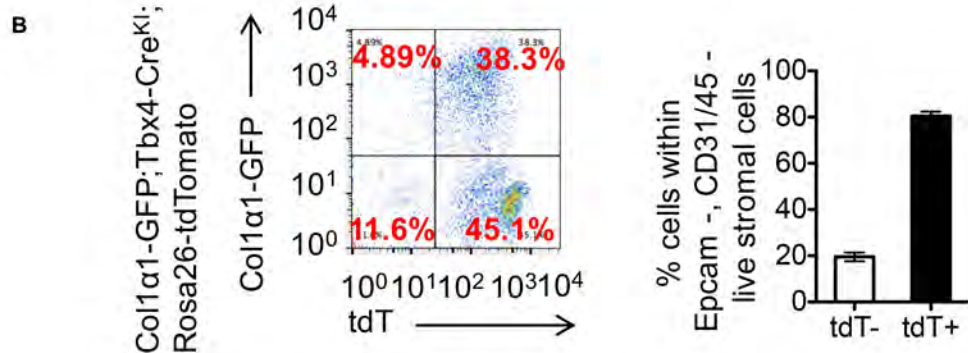

**Supplementary Figure 8** FACS analysis of Tbx4-lineage cells in the lungs of Col1 $\alpha$ 1-GFP;Tbx4-Cre<sup>KI</sup>; Rosa26-tdTomato mouse strains. **(A)** FACS analysis of lung single cells gate for 7AAD<sup>-</sup>, Epcam<sup>-</sup>, and CD31/45<sup>-</sup>. **(B)** FACS plot and percentage of 7AAD<sup>-</sup>, Epcam<sup>-</sup>, and CD31/45<sup>-</sup> stromal cells expressing tdTomato or GFP in uninjured Col1 $\alpha$ 1-GFP;Tbx4-Cre<sup>KI</sup>; Rosa26-tdTomato mouse lung.  $n = 3$  mice analyzed, mean  $\pm$  SEM.



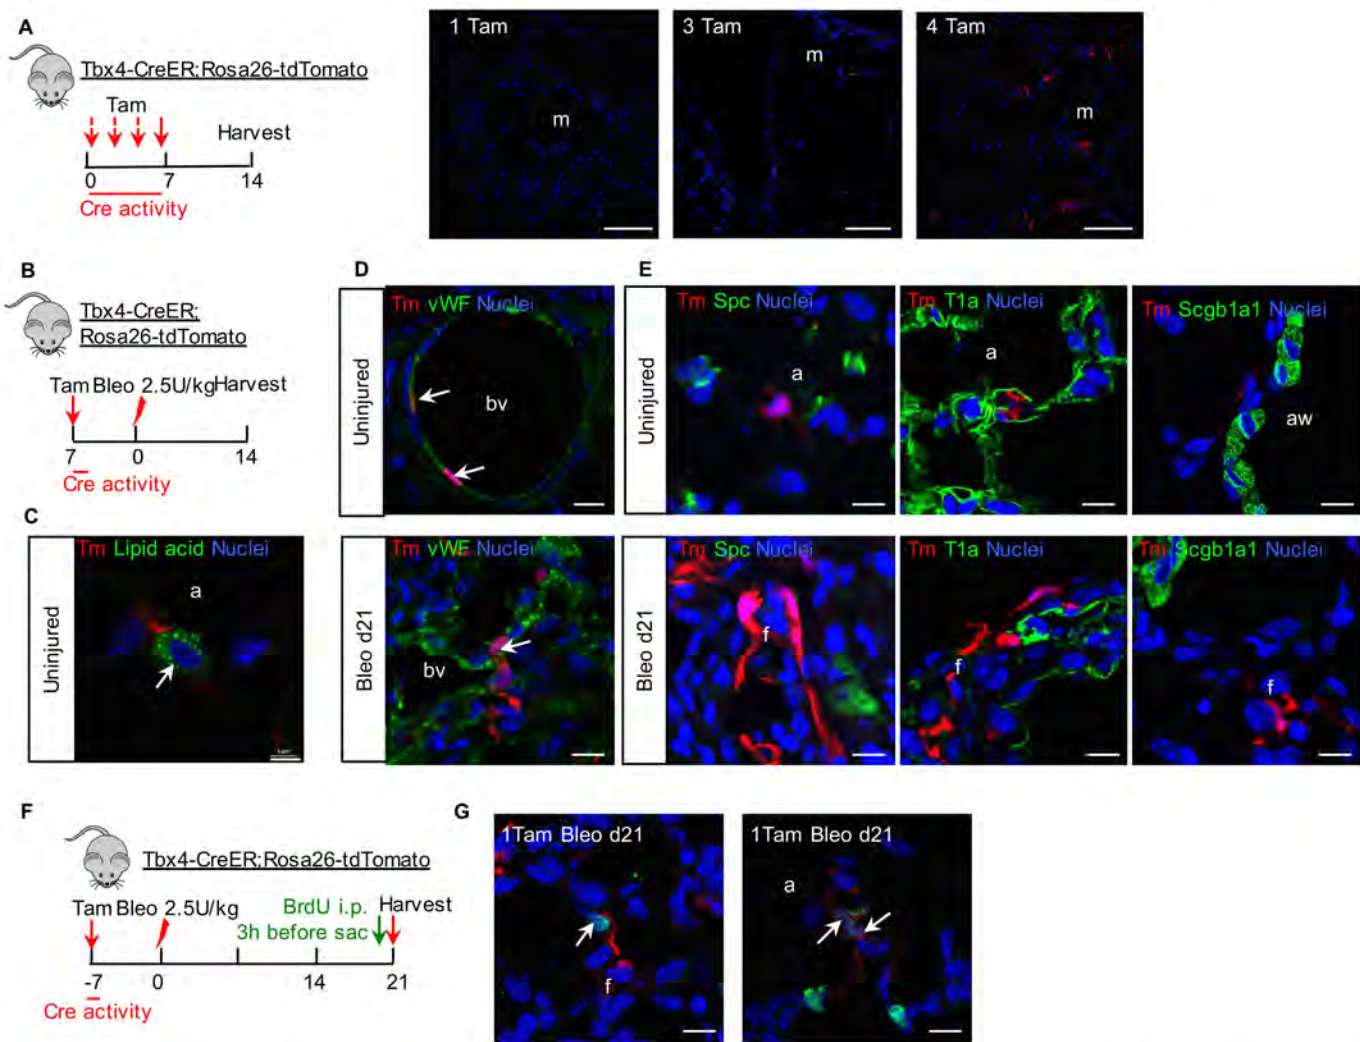

**Supplementary Figure 9** Adult tdTomato+ cells are proliferative, and include lipofibroblasts as well as endothelial cells, but not epithelial cells. **(A)** Adult *Tbx4-CreER; Rosa26-Tm* mice were injected with 1, 3, or 4 doses of tamoxifen to label *Tbx4* expressing cells. *Tbx4* cell labeling was increased in a dose dependent manner with the Tamoxifen injection times ( $n=6$  lungs examined). **(B-E)** *Tbx4-CreER; Rosa26-Tm* mice were injected with 1 dose of tamoxifen, followed with bleomycin injury, and lungs were harvested on d14 after bleomycin injury. The schematic **(B)** was used for the following experiments in this figure. Representative histological section stained for lipid acid **(C)**, von Willebrand Factor (vWF) **(D)**, CC10, SPC, and T1a **(E)** ( $n=6$  lungs examined). **(F)** BrdU labeling experiment scheme: *Tbx4*+ cells were marked in *Tbx4-CreER; Rosa-Tm* mice using one dose of tamoxifen (20 mg/g/dose). Bleomycin injury was performed intratracheally one week after tamoxifen administration. On d21 after bleomycin, BrdU was injected intraperitoneally 3 hrs before lung harvesting. Frozen section and confocal imaging were performed thereafter. **(G)** Representative images showing the tdTomato+ cells were incorporated with BrdU (arrowheads,  $n = 3$  mice examined). Scale bars, 5  $\mu\text{m}$  **(C)**, 10  $\mu\text{m}$  **(D,E,F)**, and 100 $\mu\text{m}$  **(A)**. a = alveoli, aw = airway, bv = blood vessel, f = fibrotic foci, and m = mesenchyme.

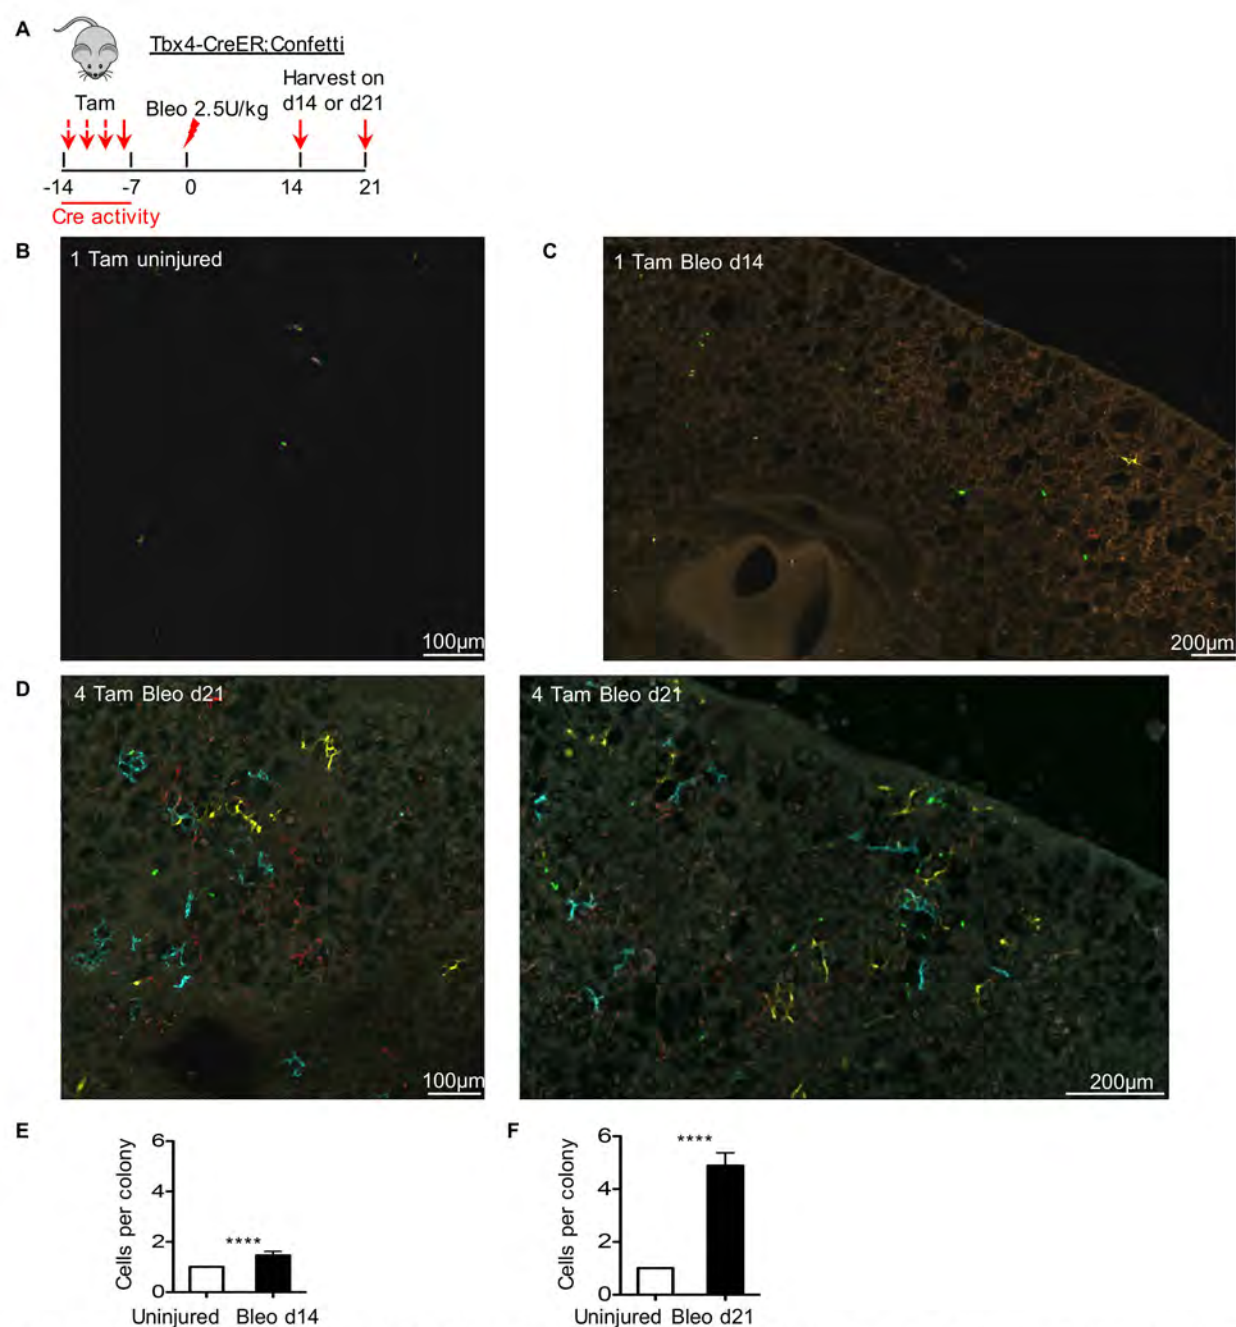

**Supplementary Figure 10** Clonal-like expansion of Tbx4<sup>+</sup> fibroblasts during fibrosis. **(A-F)** Experimental scheme **(A)**: Tbx4<sup>+</sup> cells were marked in Tbx4-CreER;Confetti mice using one or four doses of tamoxifen (12.5 µg/g/dose). Bleomycin injury was performed intratracheally one week after the last dose of tamoxifen. Mouse lungs were harvested at d14 and d21. Whole mount mouse lungs were subject to SCALE clearing and confocal imaging. **(B)** Prior to bleomycin injury, single Tbx4<sup>+</sup> cell was marked. **(C)** Bleomycin injury induced Tbx4<sup>+</sup> cell replication, producing clones of one or two identically marked cells. **(D)** Bleomycin induced Tbx4<sup>+</sup> cells self-renewal or clonal-like expansion. **(E)** Histogram of Tbx4<sup>+</sup> colony size in **(B)** and **(C)**. **(F)** Histogram of Tbx4<sup>+</sup> colony size in **(D)**. *n*=9 lungs examined in all experiment group, scale bars as indicated in figures. \*\*\*\**P* ≤ 0.0001 by Student's *t*-test; mean ± SEM).

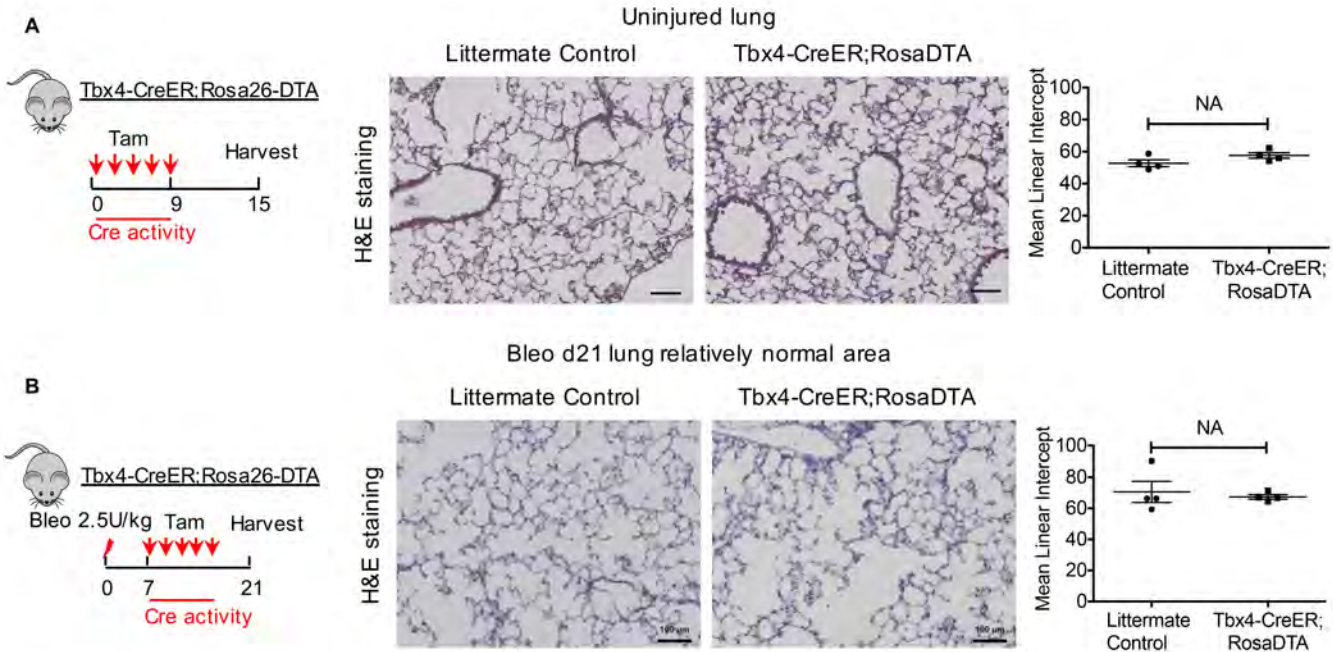

**Supplementary Figure 11** Short-term ablation of Tbx4 cells do not change lung structure in both uninjured (**A**) or relative normal area of injured mouse lung (**B**) by means of H&E staining and mean linear intercept calculation.  $n \geq 3$  mice / group examined. NA no significant difference, as analyzed by Student's *t*-test. Scale bars, 100 $\mu$ m.

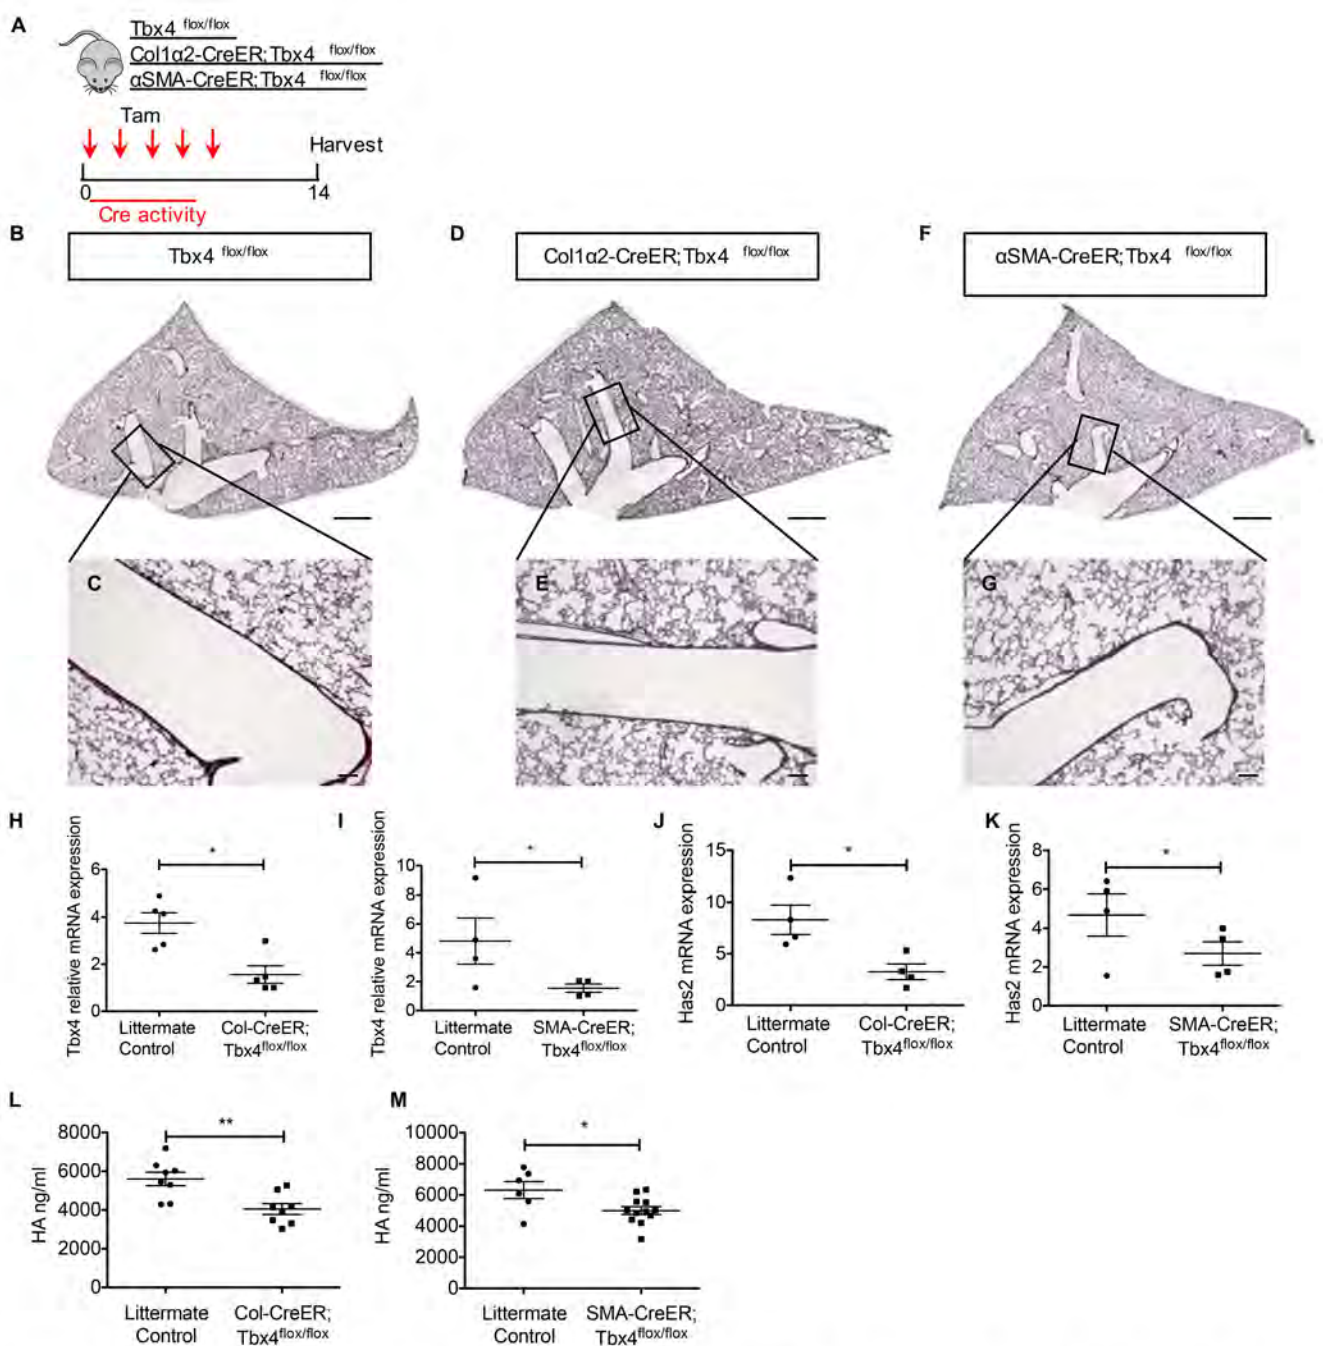

**Supplementary Figure 12** Normal lung in Col1α2-CreER;Tbx4<sup>flox/flox</sup> and αSMA-CreER;Tbx4<sup>flox/flox</sup> mice. Mouse lung histology (H&E staining) of littermates (Tbx4<sup>flox/flox</sup>) (**B-C**), Col1α2-CreER;Tbx4<sup>flox/flox</sup> (**D-E**), and αSMA-CreER;Tbx4<sup>flox/flox</sup> (**F-G**) at 9 weeks of age after 5 doses of Tamoxifen injection (20 mg/g/injection).  $n = 4$  in each group. (**H-K**) Tbx4 and Has2 expression of lung fibroblasts Col1α2-CreER;Tbx4<sup>flox/flox</sup> and αSMA-CreER;Tbx4<sup>flox/flox</sup> were analyzed by quantitative RT-PCR, and normalized by GAPDH. (**L-M**) Lung fibroblasts from Col1α2-CreER;Tbx4<sup>flox/flox</sup> and αSMA-CreER;Tbx4<sup>flox/flox</sup> were cultured. HA production from supernatants were analyzed by HA ELISA.  $n \geq 4$  mice / group examined. \* $p \leq 0.05$ , \*\* $p \leq 0.01$ , as analyzed by Student's *t*-test. Scale bars, 1mm (**B, D, F**), 100μm (**C, E, G**).

**A**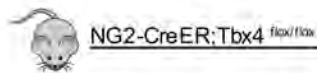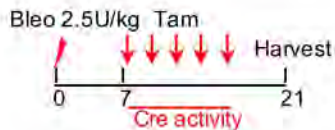**B**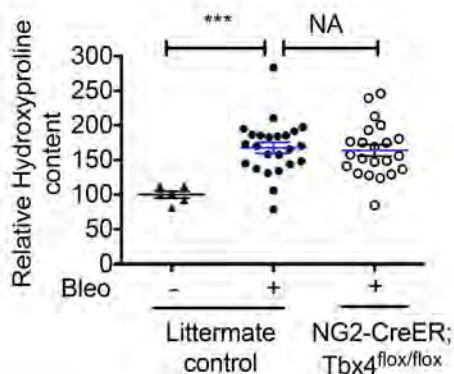

**Supplementary Figure 13** Deletion of *Tbx4* in NG2 expressing cells has no impact on fibrosis. **(A)** Strategy for inducible deletion of *Tbx4* expression in NG2+ cells. NG2-CreER;*Tbx4*<sup>flox/flox</sup> mice were used in these experiments. The above mentioned transgenic mice and their WT littermates (8 - 16 weeks old) were treated with bleomycin (2.5U/kg), followed by 5 doses of tamoxifen (20  $\mu$ g/g/injection) every other day starting on d7. The lungs were collected for hydroxyproline content determination on d21. **(B)** Targeting *Tbx4* expression in NG2+ cells have no effect on lung fibrosis (means  $\pm$  SEM, \*\*\* $p \leq 0.001$ , One-way ANOVA with Bonferroni test; uninjured littermate control,  $n = 6$ , bleo littermate control,  $n = 22$ , NG2-CreER;*Tbx4*<sup>flox/flox</sup> bleo,  $n = 20$ ). Hydroxyproline content values were expressed as percentage of control, which is set to 100%.

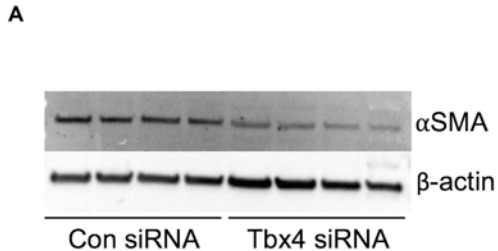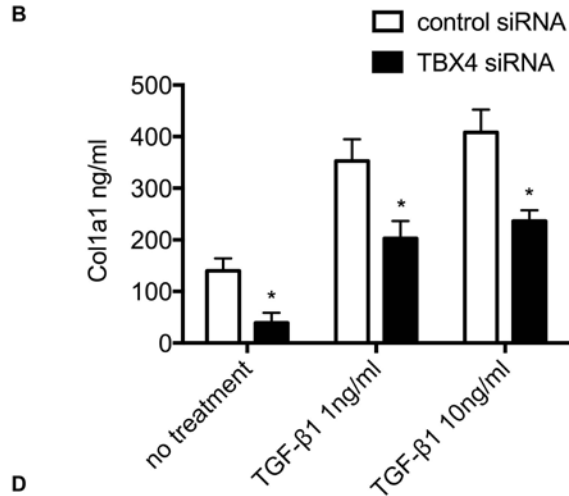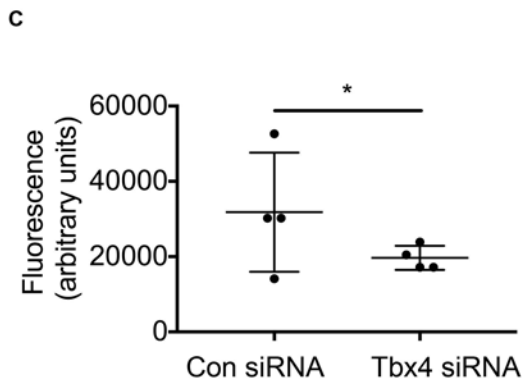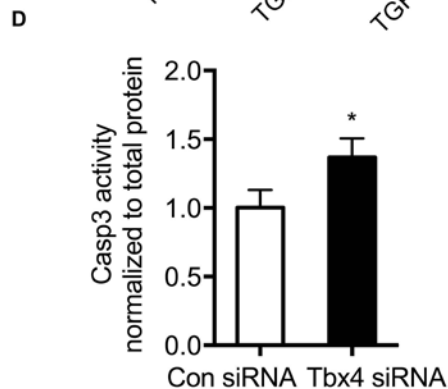

**Supplementary Figure 14** Knockdown of Tbx4 affected IPF lung fibroblast function. **(A)**  $\alpha$ SMA protein expression was reduced in IPF lung fibroblast upon Tbx4 siRNA transfection. **(B)** Tbx4 knockdown decreased the secreted Col1a1 production in IPF lung fibroblast supernatants in the presence and absence of TGF- $\beta$ 1 treatment. **(C)** Calcein AM Cell viability assay revealed a reduction of viability for Tbx4 deficient IPF lung fibroblasts. **(D)** Casp3 activity was increased in Tbx4 knockdown IPF lung fibroblasts.  $n = 4$  IPF lung lung fibroblasts examined, representative result of 3 experiments.

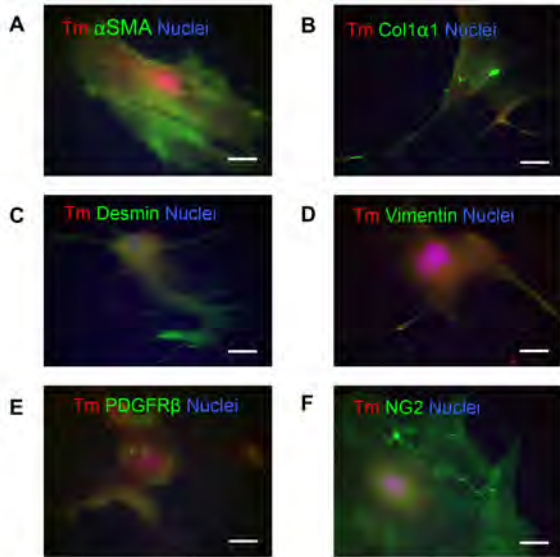

**Supplementary Figure 15** Tbx4 lineage cells express stromal cell markers in culture. **(A-F)** Lung fibroblasts were isolated from uninjured Tbx4-Cre;Rosa26-Tm mice and cultured for 3 passages. TdTomato positive cells were sorted by flow cytometry and cultured for immunofluorescence staining. Representative images for  $\alpha$ SMA **(A)**, Col1 $\alpha$ 1 **(B)**, Desmin **(C)**, Vimentin **(D)**, Pdgfr $\beta$  **(E)**, and NG2 **(F)**. Primary cells from  $n = 3$  mice examined. Scale bars, 10  $\mu$ m.

Full unedited blot for si Figure 14 sma

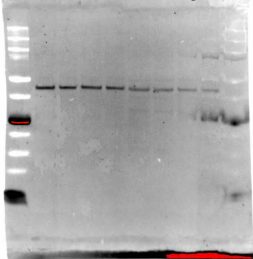



Full unedited blot for si  
Figure 14 b-actin

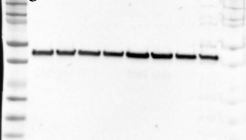

### Supplementary Table 1 Tbx4 response mesenchymal genes

| Gene symbol | Fold Change |
|-------------|-------------|
| Acta2       | 1.34497     |
| Acta2       | 2.60271     |
| Acta2       | 5.88333     |
| Adam12      | 3.10439     |
| Adam12      | 2.72716     |
| Col1a2      | 1.90932     |
| Col3a1      | 1.92797     |
| Col4a1      | 2.04113     |
| Col4a1      | 1.64705     |
| Col4a2      | 1.90476     |
| Col4a5      | 3.9369      |
| Col4a5      | 2.98105     |
| Col4a6      | 1.54582     |
| Col5a1      | 1.87582     |
| Col5a1      | 1.83045     |
| Col5a2      | 2.08097     |
| Col5a2      | 1.54845     |
| Col6a1      | 1.74991     |
| Col6a2      | 2.23893     |
| Col6a2      | 1.83583     |
| Col6a3      | 1.98669     |
| Des         | 2.09765     |
| Fgf10       | 2.92405     |
| Fgf7        | 3.07114     |
| Fgf7        | 2.97177     |
| Has2        | 3.39511     |
| Has2        | 2.7951      |
| Mmp10       | 2.41523     |
| Mmp11       | 1.55259     |
| Mmp8        | 2.87054     |
| Pdgfra      | 7.36035     |
| Pdgfra      | 2.79731     |
| Pdgfra      | 2.44939     |

**Selected up-regulated mesenchymal genes in response to Tbx4.** This table was extracted from the Affymetrix array data which Tbx4<sup>+</sup> and Tbx4<sup>-</sup> cells were sorted from Tbx4-Cre<sup>Tg</sup>;RosaTm uninjured mouse lung fibroblasts in culture. The Tbx4<sup>+</sup> and Tbx4<sup>-</sup> cells were pooled from 4 – 5 mouse lungs. The data were expressed as fold changes (Tbx4<sup>+</sup> / Tbx4<sup>-</sup>).

**Supplementary Table 2 Tbx4 response mesenchymal transcription factors**

| Gene symbol         | Fold Change |
|---------------------|-------------|
| Ebf1                | 2.16171     |
| Ebf1                | 2.05805     |
| Ebf1                | 1.60298     |
| Gata2               | 2.29148     |
| Gata2               | 2.03642     |
| Gata3               | 1.75008     |
| Gata4               | 1.63537     |
| Gata4               | 1.53031     |
| Gata5               | 1.51172     |
| Hmga1 /<br>mga1-rs1 | 1.67734     |
| Hmga2               | 1.74949     |
| Hmga2               | 1.51195     |
| Pax3                | 2.91327     |
| Pax3                | 1.68831     |
| Pax3                | 1.53283     |
| Smad1               | 1.94011     |
| Smad2               | 1.62282     |
| Smad3               | 2.52619     |
| Smad3               | 1.78529     |
| Smad5               | 1.82761     |
| Smad5               | 1.68113     |
| Smad7               | 2.28324     |
| Snai1               | 4.75153     |
| Snai2               | 4.07267     |
| Snai2               | 2.70444     |
| Sox11               | 9.35873     |
| Sox11               | 3.36148     |
| Sox11               | 2.66943     |
| Sox11               | 1.77601     |
| Sox11               | 1.73816     |
| Sox13               | 1.58862     |
| Sox4                | 3.20981     |
| Sox4                | 1.81122     |
| Sox5                | 2.44708     |
| Sox5                | 1.93192     |
| Sox9                | 1.66698     |
| Tbx18               | 3.53064     |
| Tbx18               | 1.89916     |

|      |         |
|------|---------|
| Tbx2 | 2.59443 |
| Tbx3 | 4.81164 |
| Tbx3 | 3.41996 |
| Tbx3 | 2.56435 |
| Tbx3 | 2.18837 |
| Tbx4 | 3.0827  |
| Tbx4 | 1.97045 |
| Tbx5 | 5.52309 |
| Tbx5 | 2.17176 |

**Relative expression of selected up-regulated mesenchymal transcription factors in response to Tbx4.** This table was extracted from the same Affymetrix array data from table 1. The data were expressed as fold changes (Tbx4+ / Tbx4).

### Supplementary Table 3 Tbx4 response TGF- $\beta$ family members

| TGF- $\beta$ and TGF $\beta$ R expression in Tbx4+ vs Tbx4- |          |
|-------------------------------------------------------------|----------|
| Tgfb1                                                       | -1.57093 |
| Tgfb1                                                       | -1.11491 |
| Tgfbr1                                                      | -2.24829 |
| Tgfbr1                                                      | -2.02172 |
| Tgfbr1                                                      | -1.49873 |
| Tgfb2                                                       | 1.29553  |
| Tgfb2                                                       | 1.62409  |
| Tgfb2                                                       | 2.11194  |
| Tgfbr2                                                      | 1.13563  |
| Tgfbr2                                                      | 1.97274  |

**Relative expression of selected TGF- $\beta$  family members in response to Tbx4.** This table was extracted from the same Affymetrix array data from table 1. The data were expressed as fold changes (Tbx4+ / Tbx4).
